# Supplementary material for: MUC3A promotes the progression of colorectal cancer through the PI3K/Akt/mTOR pathway
Source: Springer Nature journal article supplement (doi:10.1186/s12885-022-09709-8), 2022-06-02

HCT116 SW620  
NC/KO1/KO2 NC/KO1/KO2  
MUC3A

250kDa

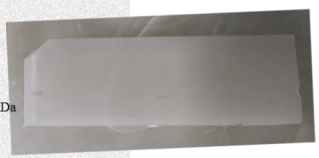

HCT116  
NC/KO1/KO2

pi3k

150kDa  
100kDa  
70kDa  
50kDa  
40kDa

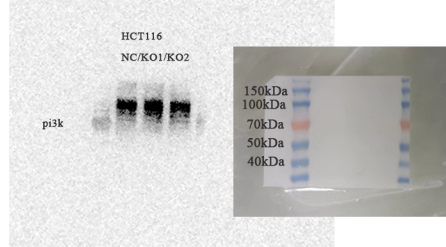

HCT116  
NC/KO1/KO2

p-pi3k

150kDa  
100kDa  
70kDa  
50kDa  
40kDa

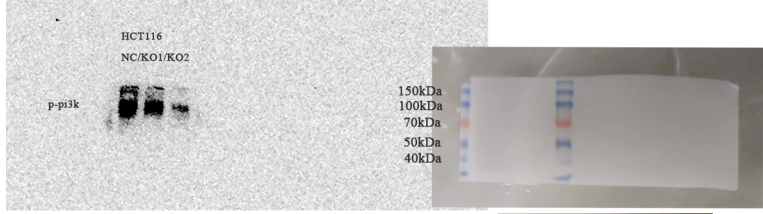

HCT116 SW620  
NC/KO1/KO2 NC/KO1/KO2  
GAPDH

40kDa  
35kDa  
25kDa

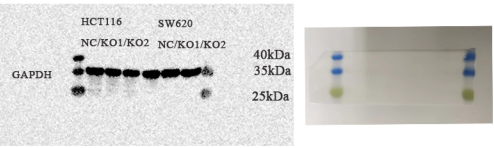

HCT116  
NC/KO1/KO2

akt

100kDa  
70kDa  
50kDa  
40kDa

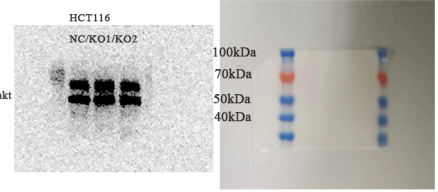

HCT116  
NC/KO1/KO2

p-akt

100kDa  
70kDa  
50kDa  
40kDa

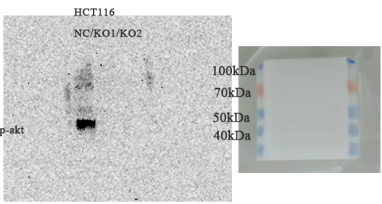

HCT116 SW620 HCT116+RAPA SW620+RAPA  
NC/KO1/KO2 NC/KO1/KO2 NC/KO1/KO2 NC/KO1/KO2  
p53

100kDa  
70kDa  
50kDa  
40kDa

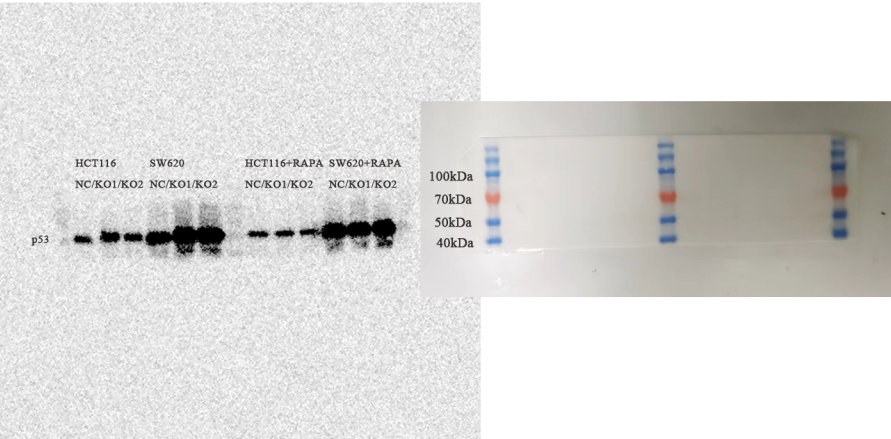

HCT116  
NC/KO1/KO2

mTOR

250kDa  
150kDa  
100kDa  
70kDa

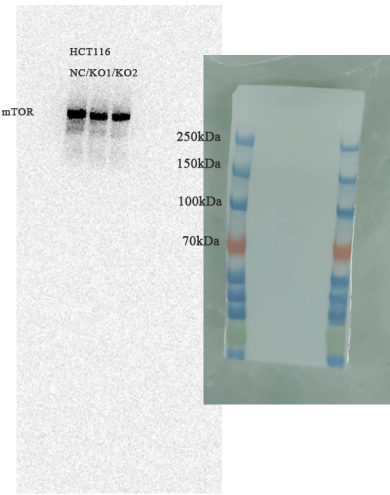

HCT116 SW620 HCT116+RAPA SW620+RAPA  
NC/KO1/KO2 NC/KO1/KO2 NC/KO1/KO2 NC/KO1/KO2  
p21

35kDa  
25kDa  
20kDa  
15kDa

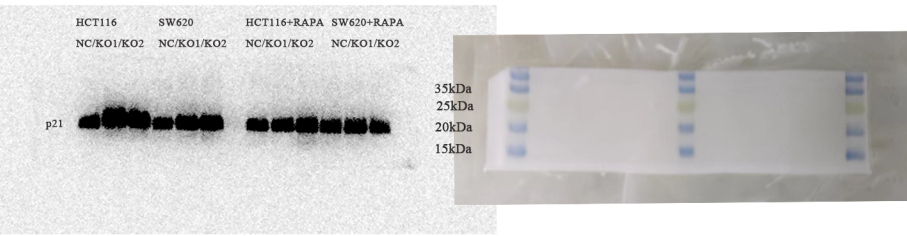

HCT116 SW620 HCT116+RAPA SW620+RAPA  
NC/KO1/KO2 NC/KO1/KO2 NC/KO1/KO2 NC/KO1/KO2  
β-Tubulin

100kDa  
70kDa  
50kDa

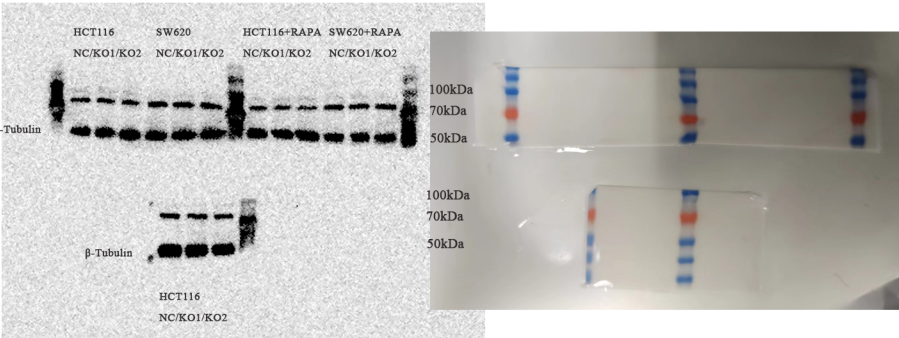

HCT116  
NC/KO1/KO2

p-mTOR

250kDa

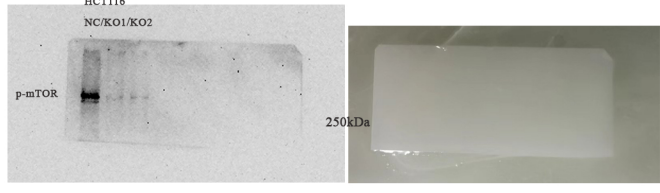

Supplement: MOESM1 [file 23121456]
